# Supplementary material
Source: PubMed Central journal article supplement (PMC2579379)
Supplement: 0804868105_0804868105SI.pdf [file 0804868105_0804868105SI.pdf]

# Supporting Information

Khiem *et al.* 10.1073/pnas.0804868105

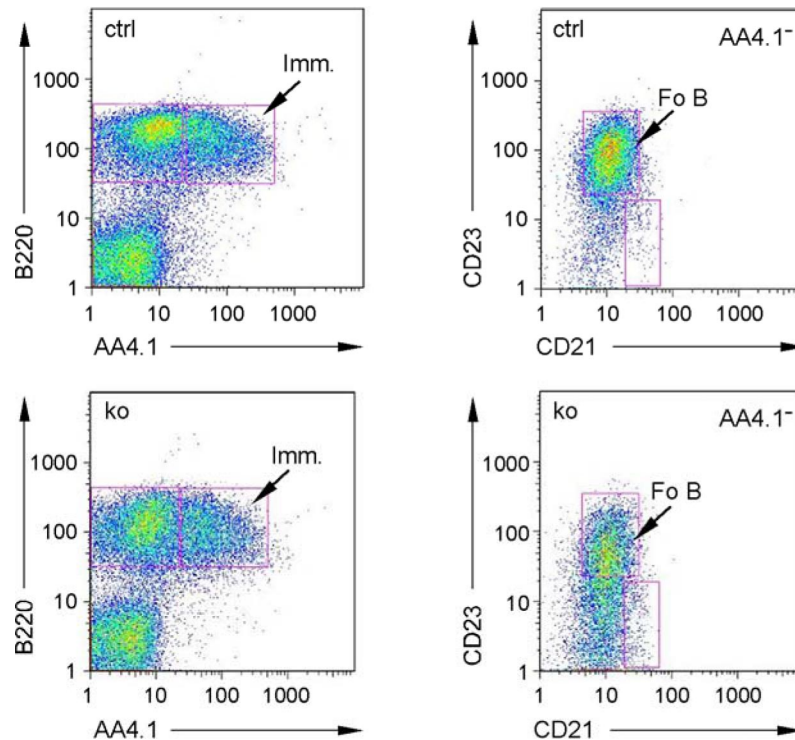

**Fig. S1.** Flow cytometry analyses of surface marker expression on splenic B cells from *Mef2c* conditional KO (ko) and control animals. Flow cytometry on spleens from *Mef2c* KO (ko, bottom row) and control (ctrl, top row) mice show a similar distribution of immature B cells (Imm., B220<sup>+</sup>, AA4.1<sup>+</sup>). Mature B cells (B220<sup>+</sup>, AA4.1<sup>-</sup>) were further separated by CD21 and CD23 expression (second column). For all experiments, Fo B cells (B220<sup>+</sup>, AA4.1<sup>-</sup>, CD21<sup>+</sup>, CD23<sup>+</sup>) expressing similar levels of CD21 and CD23 were used (denoted in panels on the right).

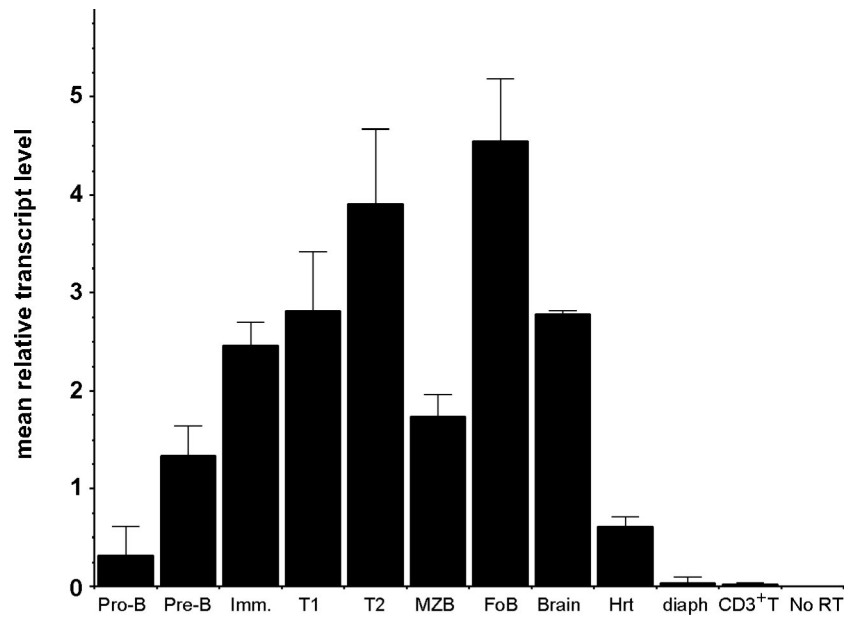

**Fig. S2.** *Mef2c* expression peaks in Fo B cells during B-cell development. *Mef2c* expression was relatively low in the B cells of the bone marrow, starting at the Pro-B-cell stage and slightly increasing at the Pre-B-cell and immature B-cell stages. In the spleen, *Mef2c* expression continued to increase as B cells matured from transitional 1 (T1) and transitional 2 (T2) stages. Fo B cell populations expressed the highest levels of *Mef2c*. *Mef2c* expression levels in MZ B cells (MZBs) were comparable to expression in the Pre-B-cell stage. Confirming earlier observations, *Mef2c* expression was nearly undetectable in T cells (CD3<sup>+</sup>T). Adult brain, heart (hrt), and diaphragm (diaph) were used as references for *Mef2c* expression. RT, reverse transcriptase.

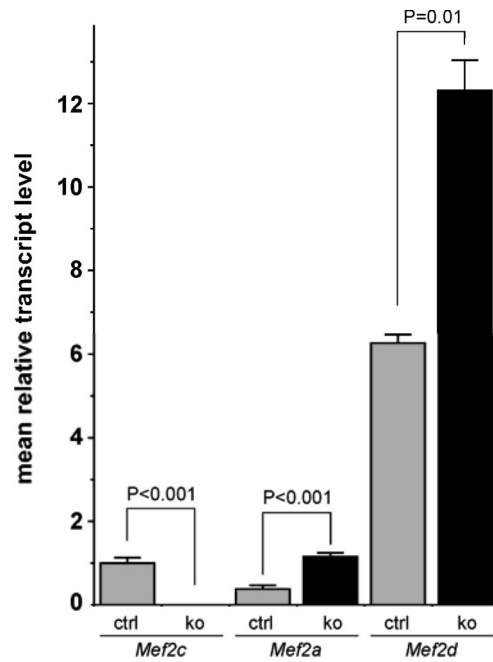

**Fig. S3.** Expression of *Mef2c*, *Mef2a*, and *Mef2d* in Fo B cells from *Mef2c* B cell KO (ko) and littermate control (ctrl) mice. *Mef2c* expression was not detectable in B-cell KO mice. Expression of *Mef2a* and *Mef2d* increased in primary Fo B cells in the absence of *Mef2c*. Relative expression (*Mef2c* in control Fo B cells equals 1) is indicated on the y axis. The data presented represent the mean plus SEM for three independent expression analyses from primary Fo B cells isolated from three KO and three control mice. *P* values were calculated by the unpaired two-tailed Student's *t* test.

**Table S1. MEF2C is required for the activation of many cell cycle genes**

| Gene name | Fold change | P        |
|-----------|-------------|----------|
| Araf      | -3.61       | 0.001136 |
| Atf2      | -4.17       | 0.026319 |
| Ccna1     | -3.71       | 0.01426  |
| Ccna2     | -10.41      | 0.05887  |
| Ccnb1     | -5.66       | 0.029677 |
| Ccnb2     | -3.94       | 0.011774 |
| Ccnd1     | -3.21       | 0.009506 |
| Ccnd2     | -2.87       | 0.06755  |
| Ccnd3     | -6.08       | 0.013067 |
| Ccne1     | -1.88       | 0.017151 |
| Cdc42     | -3.86       | 0.054512 |
| Cdk2      | -3.85       | 0.025312 |
| Cdk4      | -1.74       | 0.014033 |
| Cdk6      | -2.75       | 0.011096 |
| Cdkn1a    | -9.59       | 0.050013 |
| Cdkn1b    | -7.79       | 0.017502 |
| Cdkn1c    | -4.62       | 0.013574 |
| Cdkn2a    | -3.70       | 0.034863 |
| Cdkn2b    | -2.52       | 0.049855 |
| Cdkn2c    | -2.70       | 0.013206 |
| Cdkn2d    | -2.26       | 0.144003 |
| Chuk      | -1.12       | 0.776621 |
| Col1a1    | -2.37       | 0.234316 |
| Creb1     | -6.29       | 0.196178 |
| Crebbp    | -7.54       | 0.050784 |
| DLK1      | -4.84       | 0.587851 |
| E2f1      | -4.76       | 0.717268 |
| Egfr      | -2.68       | 0.605971 |
| Egr1      | -3.14       | 0.661391 |
| Elk1      | -3.51       | 0.06049  |
| Ets1      | -1.62       | 0.401633 |
| Ets2      | -2.17       | 0.485416 |
| Fos       | -2.01       | 0.59343  |
| Grb2      | -1.61       | 0.900978 |
| Hras1     | -1.37       | 0.180299 |
| Hspa5     | -2.56       | 0.682536 |
| Hspb1     | -3.22       | 0.289003 |
| Jun       | -3.26       | 0.043844 |
| Kcnn1     | -3.97       | 0.191843 |
| Kras      | -6.74       | 0.364158 |
| Ksr1      | -2.39       | 0.01257  |
| Map2k1    | -3.13       | 0.925675 |
| Hsp90ab1  | -1.05       | 0.04039  |
| Gapdh     | -1.08       | 0.240559 |
| Actb      | 1.72        | 0.050558 |
| Gusb      | -3.15       | 0.046355 |
| Hprt1     | -1.52       | 0.026495 |
| Map2k1ip1 | -1.17       | 0.692906 |
| Map2k2    | -1.34       | 0.995945 |
| Map2k3    | 1.01        | 0.939548 |
| Map2k4    | -1.11       | 0.017166 |
| Map2k5    | 2.84        | 0.042799 |
| Map2k6    | -1.87       | 0.493096 |
| Map2k7    | -4.54       | 0.116385 |
| Map3k1    | -2.70       | 0.324276 |
| Map3k2    | -3.72       | 0.555791 |
| Map3k3    | -2.14       | 0.351709 |
| Map3k4    | -6.09       | 0.286642 |
| Map4k1    | -2.07       | 0.629011 |
| Mapk1     | 1.36        | 0.882588 |

**Table S1. Continued**

| Gene name | Fold change | P        |
|-----------|-------------|----------|
| Mapk10    | -1.51       | 0.8337   |
| Mapk11    | -1.41       | 0.560768 |
| Mapk12    | 1.57        | 0.473684 |
| Mapk13    | 3.56        | 0.045239 |
| Mapk14    | -1.06       | 0.56543  |
| Mapk3     | -3.31       | 0.463476 |
| Mapk6     | -3.39       | 0.045957 |
| Mapk7     | -2.73       | 0.584072 |
| Mapk8     | -2.37       | 0.945837 |
| Mapk8ip1  | -1.17       | 0.980257 |
| Mapk8ip2  | 1.06        | 0.008416 |
| Mapk8ip3  | -1.32       | 0.870214 |
| Mapk9     | 1.23        | 0.062914 |
| Mapkapk2  | -1.91       | 0.888216 |
| Mapkapk5  | 1.29        | 0.607717 |
| Max       | -1.30       | 0.496133 |
| Mef2c     | -3.32       | 0.031053 |
| Mknk1     | -3.03       | 0.767517 |
| Mos       | -2.14       | 0.302586 |
| Myc       | -3.06       | 0.864793 |
| Nfatc4    | -1.49       | 0.412855 |
| Nras      | -1.35       | 0.831375 |
| Pak1      | -1.67       | 0.638628 |
| Rac1      | 1.23        | 0.847943 |
| Raf1      | -1.15       | 0.807132 |
| Rb1       | -1.28       | 0.045106 |
| Sfn       | -1.57       | 0.895166 |
| Smad4     | -1.25       | 0.937582 |
| Trp53     | -1.08       | 0.046798 |

Select genes involved in the MAPK pathway were analyzed by Taqman real-time PCR for expression in sorted splenic Fo B cells isolated from *Mef2c* B-cell KO mice compared with littermate controls. Data are expressed as fold change compared with controls. Blue numbers indicate fold decrease in gene expression; pink numbers indicate fold increase in gene expression. *P* values were determined using a two-tailed *t* test; *n* = 6 independent replicates.
